# Supplementary material for: Building consensus around the assessment and interpretation of Symbiodiniaceae diversity
Source: PeerJ. 2023 May 2;11:e15023. doi: 10.7717/peerj.15023 (PMC10162043; doi:10.7717/peerj.15023)
Supplement: Supplemental Information 1 — Mito = Mitochondrial; Chloro = Chloroplast; R = Resolves all species within the genus; D = Diagnostic (uniquely differentiates a particular species of the genus); ND = Not diagnostic (sequence/trait identical in two or more species); M = Measured but lacking congenerics or reference material for comparison; X = Not used in species description; U = Unknown (e.g., sampled from a symbiotic habitat but not necessarily likely to be the numerically dominant symbiont); Y = Yes; N = No; NA = Not Applicable; ND* = Not diagnostic of species, but lack of elongated amphiesmal vesicles is diagnostic of Cladocopium; D** = Some ITS2 sequences may be diagnostic, but others in the in the same genome may not be; Y*** = Opportunistic and occurring at background levels unless host health is compromised. Compared to Table 1, this supplement also includes authentic cultured strains, synonyms, and key references for each species. [file peerj-11-15023-s001.xlsx]

## Sheet: Sheet1
									Nuclear			Mito		Chloro
	Genus (11 total)	Species (39 total)	ITS2 Type (majority sequence)	Symbiotic?	Cultured?	Host-specificity	Cell Size	Plate Tabulation	ITS2	LSU	msat flankers	mtCOB	mtCOX1	cp23S	psbAncr	Authentic Cultured Strain	Synonyms	Key References
	Breviolum	B. aenigmaticum	-	U	Y	U	ND	X	D	D	D	ND	X	D	X	CCMP 3448 (=mac04-487)	S. aenigmaticum	Parkinson et al. 2015
	Breviolum	B. antillogorgium	B1	Y	Y	D	ND	X	ND	ND	D	ND	X	D	X	CCMP 3449 (=mac08-0689)	S. antillogorgium	Parkinson et al. 2015
	Breviolum	B. dendrogyrum	B1k, B1	Y	N	D	ND	X	D**	ND	D	ND	X	ND	D	NA	-	Lewis et al. 2019
	Breviolum	B. endomadracis	B7	Y	N	D	ND	X	D	ND	D	D	X	ND	D	NA	S. endomadracis	Parkinson et al. 2015
	Breviolum	B. faviinorum	B14, B14a, B1	Y	N	ND	ND	X	D**	ND	D	ND	X	ND	D	NA	-	Lewis et al. 2019
	Breviolum	B. meandrinium	B20, B1	Y	N	ND	ND	X	D**	ND	D	ND	X	ND	D	NA	-	Lewis et al. 2019
	Breviolum	B. minutum	B1	Y	Y	ND	ND	X	ND	ND	D	ND	X	ND	D	CCMP 2460 (=rt002)	S. minutum, S. pulchrorum	LaJeunesse et al. 2012
	Breviolum	B. pseudominutum	B1	U	Y	U	ND	X	ND	ND	D	D	X	ND	X	CCMP 3450 (=rt146)	S. pseudominutum, S. bermudense	Parkinson et al. 2015
	Breviolum	B. psygmophilum	B2	Y	Y	ND	ND	X	D	D	D	ND	X	D	X	CCMP 3320 (=rt141)	S. psygmophilum	LaJeunesse et al. 2012
	Cladocopium	C. goreaui	C1	Y	Y	ND	Y	ND*	ND	ND	X	D	D	ND	D	CCMP 2466 (=rt152)	S. goreauii	Trench and Blank 1987, LaJeunesse et al. 2001; LaJeunesse et al. 2018
	Cladocopium	C. infistulum	C2	Y	Y	D	Y	ND*	D	D	X	D	D	D	X	rt203	-	Lee et al. 2020
	Cladocopium	C. latusorum	C1b-c, C42a, C42a-b, C1c-ff	Y	N	D	Y	X	D	D	D	ND	X	X	D	NA	-	Turnham et al. 2021
	Cladocopium	C. pacificum	C1d, C1d-t	Y	N	D	Y	X	D	D	D	ND	X	X	D	NA	-	Turnham et al. 2021
	Cladocopium	C. thermophilum	C3	Y	N	ND	U	X	D	ND	X	D	D	ND	D	NA	S. thermophilum	Hume et al. 2015
	Durusdinium	D. glynnii	D1, D1-4-6	Y	N	ND	ND	X	D**	ND	D	ND	X	ND	D	NA	S. glynnii	Wham and LaJeunesse 2017
	Durusdinium	D. boreum	D15	Y	N	ND	ND	X	D	D	D	D	X	ND	X	NA	S. boreum	LaJeunesse et al. 2014
	Durusdinium	D. eurythalpos	D8, D12-13, D13	Y	N	ND	ND	X	D	D	D	ND	X	ND	X	NA	S. eurythalpos	LaJeunesse et al. 2014
	Durusdinium	D. trenchii	D1a, D1-4, D1-4-6	Y	Y	ND	ND	X	D**	ND	D	ND	X	D	D	CCMP 3408 (=A001)	S. trenchii	LaJeunesse et al. 2014
	Effrenium	E. voratum	E1	N	Y	NA	M	M	M	M	X	M	X	M	M	CCMP 3410 (=rt383)	S. voratum, S. californium, Gymnodinium varians	Jeong et al 2013
	Freudenthalidium	Fr. endolithicum	F3.8	U	Y	X	D	ND	R	R	X	R	X	R	X	ANACC CS-1274 (=P1G6)	-	Nitschke et al 2020
	Freudenthalidium	Fr. heronense	F3.7	U	Y	X	D	ND	R	R	X	R	X	R	X	ANACC CS-1273 (=P2D2)	-	Nitschke et al 2020
	Fugacium	Fu. kawagutii	F1	U	Y	U	M	X	M	M	X	X	X	X	X	CCMP 2468 (=rt135)	S. kawagutii	Trench and Blank 1987, LaJeunesse 2001; LaJeunesse et al. 2018
	Gerakladium	G. endoclionum	-	Y	N	D	ND	X	X	D	X	ND	X	R	R	NA	S. endoclionum	Ramsby and LaJeunesse 2017
	Gerakladium	G. spongiolum	-	Y	N	D	ND	X	X	ND	X	ND	X	R	R	NA	S. spongiolum	Ramsby and LaJeunesse 2017
	Halluxium	H. pauxillum	H7	U	Y	X	M	M	R	R	X	ND	X	R	X	ANACC CS-1272 (=P1C4)	-	Nitschke et al 2020
	Miliolidium	M. leei	D1.1	U	Y	U	M	X	R	R	X	R	R	X	X	rt401	-	Pochon and LaJeunesse 2021
	Philozoon	P. actiniarum	A19	Y	N	D	D	X	D	ND	X	D	ND	ND	R	NA	-	LaJeunesse et al 2021
	Philozoon	P. adriaticum	-	Y	N	D	D	X	ND	D	X	ND	ND	ND	R	NA	-	LaJeunesse et al 2021
	Philozoon	P. anthopleurum	-	Y	N	D	D	X	ND	ND	X	ND	ND	ND	R	NA	-	LaJeunesse et al 2021
	Philozoon	P. balanophyllum	-	Y	N	D	D	X	ND	ND	X	ND	D	ND	R	NA	-	LaJeunesse et al 2021
	Philozoon	P. colossum	-	Y	N	D	D	X	ND	D	X	ND	D	D	R	NA	-	LaJeunesse et al 2021
	Philozoon	P. geddesianum	-	Y	N	D	D	X	ND	ND	X	ND	D	D	R	NA	-	LaJeunesse et al 2021
	Philozoon	P. medusarum	-	Y	N	D	D	X	ND	ND	X	ND	ND	ND	R	NA	-	LaJeunesse et al 2021
	Philozoon	P. paranemonium	-	Y	N	D	D	X	ND	ND	X	ND	D	ND	R	NA	-	LaJeunesse et al 2021
	Symbiodinium	S. microadriaticum	A1	Y	Y	ND	ND	ND	D	D	X	D	X	ND	D	CCMP 2464 (=rt061)	Gymnodinium microadriaticum	Freudenthal 1962; Lee et al. 2015; LaJeunesse et al. 2017
	Symbiodinium	S. natans	-	N	Y	U	ND	ND	D	D	X	D	X	D	X	CCMP 2548 (=HA3-5)	-	Hansen and Daugbjerg 2009
	Symbiodinium	S. necroappetens	A13	Y***	N	ND	ND	ND	D	D	X	D	X	ND	D	NA	S. cariborum, S. microadricaticum subsp. condylactis	LaJeunesse et al. 2015
	Symbiodinium	S. pilosum	A2	N	Y	U	ND	X	D	D	X	D	X	D	X	CCMP 2461 (=rt185)	-	Trench and Blank 1987, LaJeunesse et al. 2018
	Symbiodinium	S. tridacnidorum	A6, A3a, A3*	Y	Y	ND	ND	ND	D**	D	X	D	X	D	X	CCMP 832 (=HH9)	-	Lee et al. 2015
