# Supplementary material for: Building consensus around the assessment and interpretation of Symbiodiniaceae diversity
Source: PeerJ. 2023 May 2;11:e15023. doi: 10.7717/peerj.15023 (PMC10162043; doi:10.7717/peerj.15023)
Supplement: Supplemental Information 2 [file peerj-11-15023-s002.xlsx]

## Sheet: Sheet1
First Name	Last Name	Email	Attended Virtual Workshop? (Y/N)	Career Stage	Affiliation	Keywords (Region, Species,Techniques, Topics)
Aubrey Jacklynn	Abadiano	aabadiano@up.edu.ph	N	Grad student	University of the Philippines- Marine Science Institute
Michelle	Achlatis	m.achlatis@uva.nl	n	postdoc	University of Amsterdam, the Netherlands	Curacao, Symbiodiniaceae symbiotic with Cliona sponges, photosynthesis, NanoSIMS
Hannah	Aichelman	hannahaichelman@gmail.com	N	Graduate student	Boston University
Sanauz	Alaei	sma378@miami.edu	N	Masters Student	University of Miami
Rebecca	Albright	ralbright@calacademy.org	N	Asst. Professor	California Academy of Sciences
Cinzia	Alessi	cinzia.alessi@ird.fr	N	PhD student	University of New Caledonia	Symbiodiniacea, ecophysiology, mangrove lagoon, coral, energetic budget, reproduction
Parisa	Alidoost Salimi	P_Alidoostsalimi@yahoo.com	N	PhD., early career		Persian Gulf, shallow/deep-sea Corals, evoloution, taxonomy,
Mahsa	Alidoostsalimi	malidoostsal@student.unimelb.edu.au	N	PhD student/Early career	University of Melboune	Coral disease, Mollusks, immunity,
Miranda	Altice	Miranda.altice@scu.edu.au	N	MSc student	Southern Cross Uni & Australian Institute of Marine Science	GBR, Durusdinium, Cladocopium, early uptake and heat-tolerance in scleractinians, heat-selected sybionts
Erik	Andersson	andrssn2@uic.edu	N	PhD Candidate	University of Illinois at Chicago	Metabolomics, microbiome, omics, host-microbe interactions, Astrangia
Colin	Anthony	colin_anthonynw@outlook.com	N	Grad student	University of Guam	West Pacific, coral, Cassiopea, flow cytometry, omics, metabarcoding, acclimation, photophysiology
Jill	Ashey	jillashey@uri.edu	N	PhD student	University of Rhode Island	ecophysiology; epigenetics; coral
Antonio	Baeza	baeza.antonio@gmail.com	N	Assoc Professor	Clemson University	Microbiome, Genomics, Transcriptomics, metabarcoding, metagenomics, eDNA
Keisha	Bahr	keisha.bahr@tamucc.edu	N	Asst. Professor	Texas A&M University- Corpus Christi	Physiology, calcification, symbiosis, thermal tolerance, OA, coral ecology, Hawaii, Caribbean
Andrew	Baker	Abaker@rsmas.miami.edu	Y	Prof	University of Miami
Anastazia	Banaszak	banaszak@cmarl.unam.mx	Y	Research Professor	Universidad Nacional Autónoma de México	Caribbean, symbiosis, UV photobiology, culturing, chorophyll fluorescence
Dan	Barshis	barshis@gmail.com	N	Associate Prof	Old Dominion University	Pacific, Red Sea, Florida, ecophysiology, thermal tolerance, 'omics, gene expression
Elizabeth	Beauchamp	lizzy.beauchamp@gmail.com	N	PhD student	Newcastle University	Pacific, Acropora, Microbiome, Proteomics, Physiology, Heat Stress, ITS2, 16s, MS
Laura	Beenham	Laura.beenham@kaust.edu.sa	N	Masters student	KAUST	Microbiome, Probiotics, Vitamins, Metabolomics
Stanton	Belford	sbelfor2@utsouthern.edu	N	Associate professor	University of Tennessee Southern	Zoantharians, symbio
Kristina	Black	kblack@utexas.edu	N	PhD Candidate	University of Texas at Austin	Seascape genomics, coral restoration, adaptation
Anthony	Bonacolta	amb195@miami.edu	N	PhD Student	University of Miami	Microbiome, Genomics, Transcriptomics, metabarcoding
Colleen	Bove	colleenbove@gmail.com	N	Postdoc	Boston University	ecophysiology; global change; Caribbean/Atlantic
Joseph	Brennan	jbrennan@connect.hku.hk	N	PhD student	The University of Hong Kong	South China Sea, subtropical coral hosts, symbiosis, physiology, heat/salinity stress
Samantha	Buckley	sb3061@nova.edu	N	Research Associate	NOVA Southeastern University	Caribbean, SCTLD, algal symbionts, symbiosis, susceptibilty
Patrick	Buerger	patrick.buerger@mq.edu.au	N	Research Scientist	Macquarie University	Assisted evolution, Omics, single-cell seq, genetic engineering
Daisy	Buzzoni	daisybuzzoni@gmail.com	N	PhD student	University of Victoria, Canada	Tropical Pacific, ITS2, symbiont community dynamics, host provisioning, specificity, marine heatwaves
Erika	Cabell	ecabell@hawaii.edu	N	PhD Student	University of Hawaii	Symbiosis, octocorals, Hawaii
Emma	Camp	emma.camp@uts.edu.au	N	Faculty	University of Technology Sydney	Australia, Symbiodiniaceae, Coral, Elementomics, ITS2, Photophysiology, Transcriptomics, Metabolomics, Ecophysiology, Global change, Natural Extremes,
Rodrigo	Carballo-Bolaños	rodcar@ntu.edu.tw	N	Postdoc	National Taiwan University	Pacific Ocean, ecophysiology, metabolic and nutritional performance, adaptation, acclimatization
Sheena	Chung	sheenachung@connect.hku.hk	N	MSc student	GEOMAR Helmholtz Centre for Ocean Research Kiel; Justus Liebig University Giessen, Germany	Indopacific, stony corals, symbiont engineering, microbiome, evolutionary ecology, omics
Danielle	Claar	danielle.claar@gmail.com	Y	Research Scientist	Washington State Department of Natural Resources	Symbiosis, resilience, Ecology, remote sensing, stressors
Mary Alice	Coffroth	coffroth@buffalo.edu	y	prof	university @Buffalo	Early ontogeny, response to bleaching, cultures
Rianna	Collins	rianna.collins@vuw.ac.nz		Grad student	Victoria University of Wellington	Secretome, proteomics
David	Combosch	comboschd@triton.uog.edu	N	Assoc Professor	University of Guam	Micronesia, ITS2, coral population genetics & genomics
Alexandra	Cormack	aleandra.cormack@students.uvi.edu	N	Grad Student	University of the Virgin Islands	Sumbiosis, shuffling, switching, invasion, algal cultures, trade offs
Adrienne	Correa	ac53@rice.edu	Y	Asst. Prof.	Rice University, USA	Community diversity and interactions, symbiont dispersal, viruses of Symbiodiniaceae, sexual recombination and meiosis
Samantha	Coy	srose01.sr@gmail.com		Postdoc	Rice Univ	Marine and Freshwater Plankton, SCTLD, Caribbean, Symbiodiniaceae, Microbiome, Virology, Copepods, Quantitative Ecology, Top down regulation, Confocal Microscopy, Flow Cytometry, ISH, IF, omics, culturing
Ross	Cunning	ross.cunning@gmail.com	N	Research Scientist	John G. Shedd Aquarium	Caribbean, ITS2, symbiont community dynamics, symbiont shuffling, microbiome, symbiosis modeling, RStats
Sarah W	Davies	daviessw@bu.edu	Y	Asst. Prof.	Boston University, USA	Population genetics, Cladocopium, ITS2 metabarcoding, gene expression, symbiosis and dysbiosis
Javier	del Campo	jdelcampo@ibe.upf-csic.es	Y	Group Leader	Insitut de Biologia Evolutiva (UPF - CSIC)	Microbiome, Eukaryome, Metagenomics, Single-cell Methods
Walter	Dellisanti	walter.dellisanti@gmail.com	N	Postdoc	The Hong Kong Polytechnic University	Ecophysiology, subtropics, metabolic performance, energy budget
Hugo	Denis	hugo.denis@ird.fr	N	PhD student	Paris Sorbonne University	Coral/Symbiont genomics, Heat tolerance genetic basis
Carly	Dennison	Caroline.dennison@rsmas.Miami.edu	N	PhD student	University of Miami	Symbiosis, SCTLD, algal symbionts, physiological trade offs
Sofia	Diaz de Villegas	cic60@txstate.edu	N	MS student	Texas State University	Symbiosis-immunity tradeoffs; Exaiptasia; transcriptomics; physiology
Erika	Diaz-Almeyda	ediazalmeyda@gmail.com	N	Assistant Professor	New College of Florida	Mexico, Ofav, Apal, Cxam, Symbiodinium, physiology, thermotolerance, omics
Muhammad Yusuf	Dosoky	m_dosoky@sci.psu.edu.eg	N	Postdoc	Port Said University	Red Sea, Egypt, Symbiodiniaceae genetic diversity, SymPortal profiling, Reef resilience, Coral bleaching.
Camryn	Dunekack	camrynld@hawaii.edu	N	Undergraduate Student	Hawaii Institute of Marine Biology, UH Manoa	Symbiodiniaceae, Montipora, Hawaii, -omics, coral resilience, evolution, symbiosis, physiolgy, ecology, climate change
Kathleen	Durkin	kdurkin@g.hmc.edu	N	Undergraduate student	Harvey Mudd College	stony corals, octocorals, symbiosis, holobiont, stress response, epigenetics,
Ryan	Eckert	Ryan.j.eckert@gmail.com	N	PhD Student	Florida Atlantic University	Genomics, population genetics, its2, mesophotic, ecology
Jessica	Erwin	Jessica.lane313@yahoo.com	N	BSc applying to MSc 2023
Breno	Esposito	breno@iq.usp.br	N	Associate Prof	University of São Paulo	Coral, bioinorganic chemistry, mineral, metal, supplement, iron, manganese, resilience, bleaching, aquiculture
Zach	Ferris	zferris2022@my.fit.edu	N	PhD Student	Florida Institute of Technology
Mark	Freeman	Mafreeman@rossvet.edu.kn	Y	Prof	Ross university school of veterinary medicine
Jörg	Frommlet	jfrommlet@ua.pt	N	Researcher	University of Aveiro, Portugal	Symbiodiniaceae, free-living life history, algal culturing, bacterial interactions, microbial ecology, biogeochemistry, endolithic niche, photobiology
Matthew	Gamache			Grad Student
Amana	Garrido	amana.garrido@gmail.com	N	Postdoc	University of São Paulo, Brazil - Center for Marine Biology	South Atlantic coral reefs, Breviolum, Cladocopium, Millepora, Mussismilia, ITS2 metabarcoding, coral bleaching, dysbiosis
Gowri Krishna	Girja	gowri.krishna@gmail.com	N	PhD student	National Taiwan Ocean University	Taiwan, sun coral microbiome, ocean acidification, calcification
Dezmond	Goff	dezmond@sound.bio	N	Lab Manager	SoundBio Lab	citizen science, science education, microbiome, ecology, climate
Matias	Gomez-Corrales	matias_gomez@uri.edu	N	PhD student	University of Rhode Island	Caribbean, Orbicella spp, Diploria labyrinthiformis, pop genomics, bleaching, foraminifera
Raúl	González-Pech	rag5851@psu.edu	Y	Posdoctoral fellow	Pennsylvania State University	Comparative genomics, symbiosis, genome evolution, Symbiodiniaceae
Alexandra	Good	agood1@islander.tamucc.edu	N	PhD student	Texas A&M University- Corpus Christi	coral physiology - respirometry, ecology, Hawaii
Hugo	Harrison	hb.harrison@gmail.com	N	Senior Research Fellow	James Cook University	Symbiodiniacea biogeography, coral physiology, coral bleaching, adaptation
R. Riley	Hatch	rhatc004@fiu.edu	N	PhD candidate	Florida International University	Interspecies interaction in Symbiodiniaceae cultures, Symbiodiniaceae microbial change under temp/nutrient stress, Exaiptasia pallida
Róisín	Hayden	rhayden@connect.hku.hk		Grad student	The University of Hong Kong	Competition, FISH-FLOW, transcriptomics
Sanaz	Hazraty-Kari	s.hazrati@hotmail.com	N	PhD student	University of the Ryukyus	Pacific ocean, Persian Gulf, shallow corals, Symbiosis, reproductive biology, coral bleaching, algal culturing, acclimation/adoptation
Evan	Heit	Evanmorrisheit@gmail.com	N	Masters student	Victoria University of Wellington
Fedra	Herman	fedra.herm@gmail.com	N	Masters student	The University of Queensland, Australia	coral restoration, marine conservation, conservation biology, Australia, Europe, Belgium, climate change, plastic pollution
Katie	Hillyer	katie.hillyer@des.qld.gov.au	N	Senior Scientist	Department of Environment and Science, QLD Government	Physiology, stress, omics
Kenneth	Hoadley	kdhoadley@ua.edu	Y	Asst prof	University of Alabama	Photobiology, phenotype, physiology, climate change
Lauren	Howe-Kerr	lhoweker@nsf.gov	Y	Knauss Fellow	Rice University, USA, National Science Foundation, USA	Community diversity, symbiont-symbiont interactions, resilience, Symbiodiniaceae viruses, meiosis
Emily	Howells	em.howells@gmail.com	Y	Senior Research Fellow	Southern Cross University	GBR, Indo-Pacific, coral symbioses, adaptation
Danwei	Huang	huangdanwei@nus.edu.sg	N	Faculty	National University of Singapore	Coral systematics, coevolution, community ecology, population genetics
Adriana	Humanes	adrihumanes@gmail.com	N	Post-doc	Newcastle University, Coralassist Lab	Heat tolerance heritability, intrapopulation variation is heat tolerance, selective breeding
Sandy Shiou-Han	Hung	shiou-han.hung@kaust.edu.sa	Y	PhD student	King Abdullah University of Science and Technology	Red Sea, Cassiopea, cnidarian-Symbiodiniaceae symbiosis, transcriptomics, genome, model organism
Alexa	Huzar	ahuzar@bu.edu		Lab Tech	Boston University
Baquiran	Jake Ivan	jipbaquiran@gmail.com	N	Researcher/Incoming PhD student	University of the Philippines-Marine Science Institute	Philippines, acroporids, Symbiodiniaceae, assisted evolution, microbiome, disease, anthropogenic activities, gene expression
Erika	Johnston	erikacj@hawaii.edu	N	Post-doc	Hawaii Institute of Marine Biology	Pocillopora, Montipora, Hawaii, Moorea, Pacific, psbA, ITS2, larvae, evolution, ecology
M.Rajesh	Kannan	rajeshlifescience@gmail.com		PhD student	Madurai kamaraj university	Molecular taxanony stusies in coral endosymbionts in palk		bay, india
Rich	Karp	Rfk30@miami.edu	N	PhD student	University of Miami
Richard	Karp	rfk30@miami.edu	N	PhD Student	University of Miami	Restoration, symbiont shufflings, culturing, thermal tolerance
Elise	Keister	ekeister@uab.edu	N	PhD candidate	University of Alabama at Birmingham	ecology, physiology, symbiosis, Pacific, Florida, gene expression, reproduction, climate change
Dusty	Kemp	dwk@uab.edu	Y	Asst Prof	University of Alabama at Birmingham	Symbiodiniaceae, ecophysiology, algal cultures, climate change, bleaching, isotopes, Cassiopea, reproduction
Carly	Kenkel	ckenkel@usc.edu	N	Asst Prof	University of Southern California	symbiosis, ecology, evolution, amplicon sequencing, gene expression, population genetics, physiology
Shashank	Keshavmurthy	coralresearchtaiwan@gmail.com	N	Postdoctoral Researcher	Academia Sinica, Taiwan	Eco-Physiology, High-latitude and Marginal coral communities, Nuclear Power Plant, Seasonal dynamics, Seasonal diversity
Rama Chandra	Khandavilli	chandookh@gmail.com	N	Early	-
Samantha	King	samking@arizona.edu	N	PhD student	University of Arizona	Symbiosis, holobiont, ecology, evolution, omics, acclimation/adaptation, aquaculture
Hiroki	Kise	h.kise@aist.go.jp	N	Post-doc	National Institute of Advanced Industrial Science and Technology	Taxonomy, ecology, niche, latitudinal variation, zoantharians and other understudied hosts, diversity
Sheila	Kitchen	kitchens.osu@gmail.com	Y	Asst Prof	Texas A&M University at Galveston	symbiosis, hybridization, convergence, molecular ecology, Aiptasia, coral, Cassiopea
Courtney	Klepac	cklepac@mote.org	N	Postdoc	Mote Marine Laboratory	Caribbean, Pacific, ecophysiology, symbiosis, heat tolerance, climate change, Symbiodiniaceae, ecology, evolution
Nicola	Kriefall			Grad Student
Michael	Kühl	mkuhl@bio.ku.dk	N	Professor	University of Copenhagen, Denmark	symbiosis, ecophysiology, biophotonics, microenvironmental analysis, corals, Cassiopea, bioimaging, optical sensing
Matthieu	Leray	leray.upmc@gmail.com	N	Staff scientist	Smithsonian Tropical Research Institute, Panama	Symbiosis, resilience, Isthmus of Panama, evolution, omics, microbiome
Katey	Lesneski	katey@coralvitaa.co	N	Director	Coral Vita	Caribbean, reef restoratation, reef ecology, transcriptomics
Nastassja	Lewinski	nalewinski@vcu.edu	N	Associate Professor	Virginia Commonwealth University	Coral cell cultures, engineered nanoparticles
Vivian	Li	yvl6147@psu.edu	N	PhD student	Penn State University	Microbiome, omics, synthetic communities, probiotics
Ronen	liberman	ronenliberman@gmail.com	y	Phd student	Tel aviv university	Octocorallia, Gulf of Aqaba, Symbiosis, mesophotic
GuoHui	Liu	sdlgbio@126.com	N	Faculty	Hanshan normal university	giant clam,coral reef,Symbiodiniaceae,ITS2
Jenny	Liu	jennyliu1324@gmail.com	N
Cheryl	Logan	Clogan@csumb.edu	N	Professor	CSU Monterey Bay	Physiology, thermal tolerance, omics, modeling
Piscetta	Madeline	mpiscetta@gmail.com	N	early career	University of Miami
sara	madrid	sara.madrid3300@gmail.comN		prof	French high school	aquaculture - marine ecology
Justin	Maire	justin.maire@unimelb.edu.au	n	Postdoc	University of Melbourne	GBR, microbiome, cultures, probiotics
Shelby	Marhoefer	shelby.marhoefer@my.jcu.edu.au	N	Early career/prospective PhD student		stony corals, resilience, physiology, assisted evolution, genomics
Harmony	Martell	harmonyamartell@gmail.com	N	postdoc	University of British Columbia | Florida International University	ecophysiology, thermal stress, hormesis, priming, metabolism, bleaching/dysbiosis
Shayle	Matsuda	shaylematsuda@gmail.com	N	Post-doc	Shedd Aquarium	Symbiodiniaceae, symbiosis, microbiome, climate change, heat tolerance, Hawaii, Florida Keys
Julia	McDonough	jmcdono4@u.Rochester.edu	N	Recent Grad	University of Rochester
Mónica	Medina	momedinamunoz@gmail.com	N	Professor	Penn State University	Caribbean, corals, microbiome
Dan	Merselis	DanielMerselis@gmail.com	N	Assistant Professor	Northeastern University	restoration, amplicon sequencing, bleaching, trade-offs, immunity
Roxanna	Miller	roxanna.miller@noaa.gov	N	Research Scientist	National Marine Sanctuary of American Samoa	SCTLD, Pacific susceptibility, algal symbionts
Cody	Miner	c.miner@whitney.ufl.edu	N	Grad Student	University of Florida Whitney Lab	Cassiopea, amoebocytes, symbiotic establishment and maintenance, development
Nuradilla	Mohamad-Fauzi	dilfauzi@um.edu.my	N	Senior Lecturer	Universiti Malaya, Malaysia	Malaysia, Symbiodiniaceae, ITS2 metabarcoding, association, Heteractis magnifica, Heliopora
Sandra	Montaño Salazar	sandra.montano@univie.ac.at	N	PhD student	University of Vienna, DOME	Symbiodinaceae, symbiosis, single cell RNA sequencing
Gabriel	Moreira	grmmoreira@iq.usp.br
Kathy	Morrow	morrow.kathleen@gmail.com	N	K-12 Teacher	Thomas Jefferson High School for Science and Technology	Microbiome, 'Omics, Coral Ecology, Aipstasia, Astrangia
Elena	Mujica	elenamujica@berkeley.edu
Casandra	Newkirk	cnewkirk13@gmail.com	N	Post-doc	UNC Charlotte	Cassiopea, ecology, cell biology
Matthew	Nitschke	nitschkematthew@gmail.com	Y	Research Scientist	Australian Institute of Marine Science	Taxonomy, Ecology, Physiology, Photobiology, Niche, Simulation, Traits, Competition, Molecular Biology
C. Isabel	Nunez Lendo	inezlendo@gmail.com	N	Research Assistant	University of Technology Sydney / IUCN	Regions (Caribbean, Indo-Pacific, South and North Pacific, Red Sea), Species (Acropora spp, Montipora spp, Favites spp, Lobactis/Fungia spp, Pocillopora spp, Montastrea spp.), ecophysiology, metabolism (photosynthesis, respiration, calcification), energy reserves (lipids, proteins, and carbohydrates), pigment content (chlorophylls), heat tolerance, C:N and trace elements, photobiology, reproducti…
Garret	O'Donnell	garret.thomas.o@gmail.com	N	Masters Student	University of Guam	Population genetics, ecophysiology, CBASS, bioinformatics
Clint	Oakley	clint.oakley@vuw.ac.nz	Y	Research Fellow	Victoria University of Wellington	Systems biology, proteomics, Exaiptasia, ecophysiology, symbiosis
Haley	Oleynik	h.oleynik@oceans.ubc.ca	N	PhD student	University of British Columbia
Daniel	Olivares-Zambrano	danielo7@usc.edu	N	Grad Student	University of Southern California	symbiosis, culturing, population genetics, physiology
Jing Hui	Ong	ong.jinghui@u.nus.edu	N	PhD student	National University of Singapore	Southeast Asia, connectivity, microbiome
Eslam	Osman	eom.osman@gmail.com	N	Postdoctoral Researcher	KAUST	Tolerance, Red Sea
Jacqueline	Padilla Gamino	jpgamino@uw.edu	N	Faculty	University of Washington	Coral reproduction, ecophysiology
K. Blue	Pahl	kdpahl@crimson.ua.edu	N	PhD student	University of Alabama	Symbiosis, photophysiology, species interactions, climate change, bleaching
Ana	Palacio	Apalacio@rsmas.miami.edu	N
John	Parkinson	jparkinson@usf.edu	Y	Asst. Prof.	University of South Florida, USA	cultures, taxonomy, genome sequencing, transcriptomics, methylomics, intraspecific variation, evolution, symbiosis establishment, specificity, inter-partner signaling, cell biology, Aiptasia, conservation, Caribbean, Japan
Stephanie	Peak	speak@unc.edu	N	PhD student	University of North Carolina at Chapel Hill	Southeast US; Aiptasia and other model organisms; functional genomics, microscopy, genetic engineering, cell biology; host-symbiont interactions, specificity, recognition, bleaching
Ricardo	Pedraza-Pohlenz	ricardo.pedrazapohlenz@kaust.edu.sa	N	MSc student	King Abdullah University of Science and Technology	Red Sea, Aiptasia, genomics, heat stress, spawning
Dean	Philpot	dean.philpot@outlook.com	N	Director	Moreton Bay Restoration Initiative	Australia, Coral Reef and Marine Habitat Restoration, Symbiotic Resilience, Networking, Potential Work Experience Research Sites
Claudia	Pogoreutz	c.pogoreutz@gmail.com	N	TT Jr Full Professor (as of 1 Feb 2023)	CRIOBE, Université de Perpignan, France	symbiosis, host-microbe interactions, microbe-microbe interactions, microbial metabolism, co-cultures, NanoSIMS, biogeochemistry, chemical ecology
Maya	Powell	maya.powell@unc.edu	N	PhD Student	University of North Carolina at Chapel Hill	Ecophysiology, symbiosis, microbiome, omics, ITS2 and 16S metabarcoding, resilience, acclimatization, Caribbean
Carlos	Prada	prada@uri.edu		Faculty	University of Rhode Island
Kate	Quigley	kquigley@minderoo.org	N	PI/Research Director	Minderoo Foundation	Symbiosis, ecology, technology, sequencing, modelling, adaptation
John Bennedick	Quijano	jbquijano@up.edu.ph	N	MSc student	University of the Philippines Diliman - The Marine Science Institute	Molecular Ecology
K Diraviya	Raj	diraviyam_raj@yahoo.co.in	N	Asst Prof	Suganthi Devadason Marine Research Institute, India	Gulf of Mannar, India; New to this field and want to understand the diversity of Symbiodiniaceae in the Gulf of Mannar
Hannah	Reich	hgreich16@gmail.com	Y	Postdoc	University of New Hampshire	algal culturing, bacterial interactions, physiology, photobiology, enzymology, elementomics, metallomics, Caribbean, IndoPacific, coral bleaching
Alicia	Reigel	reige012@gmail.com	N	Postdoc	Appalachian State University	symbiosis, microbiome, octocorals,Caribbean, Atlantic temperate reefs
James	Reimer	jreimer@sci.u-ryukyu.ac.jp	Y	Associate Prof	University of the Ryukyus	Taxonomy, ecology, niche, microscale variation, zoantharians and other understudied hosts, diversity
Wally	Rich	walter.richiv@kaust.edu.sa	N	Postdoc	King Abdullah University of Science and technology	Red Sea, Stylophora, coral ecology, physiology
Mariana	Rocha de Souza	marianarochadesouza@gmail.com	N	Recent PhD graduate	NOAA	Hawaii, ITS2 metabarcoding, Durusdinium, Cladocopium, Bleaching
Adriana	Rodriguez	aprodriguezb33@gmail.com	N	Recent grad	Universidad de los Andes	Coral symbionts, Deep-sea corals, ecology, evolution, microbiome, species delimitation
Irene	Rodriguez	ibrodriguez@msi.upd.edu.ph	N	Associate Professor	University of the Philippines Diliman - The Marine Science Institute	Symbiodiniaceae, Metallomics, Nutrients, Biogeochemistry, Biotechnology
Paola	Rodríguez Troncoso	alma.rtroncoso@academicos.udg.mx	N	Facultly	Universidad de Guadalajara	Eastern Tropical Pacific, community ecology, physiology
Liza	Roger	Liza.Roger@asu.edu	N	Asst Prof	Arizona State University	Symbiosis, environmental sensing, photosynthesis, fluorescence, oxidative stress, Breviolum
Teagan	Roome	Teagan7@hawaii.edu	N	Undergraduate student	Hawaii Institute of Marine Biology, UH Manoa	corals, climate change, coral restroation, reef ecology, coral physilogy, eco-physiology, climate change stressors, bleaching environmental history, ecosystem services, tradeoffs
Edmée	Royen	Edmee.Royen@doct.uliege.be	N	PhD student	University of Liège (Be)	Symbiosis, photosynthesis, respiration, fluorescence, heat stress, sCassiopea, Mastigias, Exaiptasia
Osama	Saad	shurhabil@hotmail.com	N	Asst Prof	Red Sea University	ITS2 metabarcoding, sequencing, Symbiodiniacea ecology, algal culturing, Red Sea
Eugenia	Sampayo	eugeniadesampayo@gmail.com	Y	Research Scientist	The University of Queensland, Australia	Symbiodiniaceae biogeography, ecology and taxnomy; coral bleaching; coral-algal physiology, early life stage symbiosis
Starko	Samuel	samuel.starko@uwa.edu.au	N	Postdoc	University of Western Australia	Molecular ecology, symbiosis, adaptation
Scott R.	Santos	srsantos@buffalo.edu	Y	Professor	University at Buffalo	Symbiodiniaceae, population genetics, Exaiptasia
Sherry Lyn	Sayco	Sherrylyn.Sayco@gmail.com	N	PhD student	University of the Ryukyus	Japan/Philippines, Coral, giant clams, Physiology, symbiosis, Bleaching
Hugo	Scharfenstein	hugo.scharfenstein@gmail.com	N	PhD	University of Melbourne	Switching, thermal tolerance, community diversity
Verena	Schoepf	v.schoepf@uva.nl	N	Asst Prof	University of Amsterdam	coral eco-physiology, climate change stressors, bleaching, OA, multi-stressor environments, extreme coral habitats, environmental history
Claudia	Scirè Scappuzzo	claudia.scirescap@gmail.com	N	MSc/grant holder/looking for PhD position	CNR - National research council, Mazara del Vallo, Italy	Ecology, fisheries, sclerocronology, growth patterns, artisanal fishing, recreational fishing, biological traits
Carly	Scott	cbscott@utexas.edu	N	PhD Candidate	University of Texas at Austin	microbiome, omics, temporal, bleaching, Indopacific, Carribbean, life history, population genetics
Koty	Sharp	ksharp@rwu.edu	N	Faculty	Roger Williams University	Astrangia, Breviolum, reproduction, microbiome, symbiosis
Zongyan	Shi	szy940303@gmail.com	N	PhD student	University of the Ryukyus	Physiology, symbiosis, photobiology, bleaching, algae culturing
Susana	Simancas-Giraldo	sussim@uni-bremen.de	N	PhD candidate	Bremen University	Eco-Physiology, Octocorals, ocean acidification, thermal stress, eutrophication, microscopy, Caribean, Red Sea
Ed	Smith	ed.smith@uncc.edu	Y	Research Associate	University of North Carolina at Charlotte	Genomics, thermal tolerance, symbiosis
Robin	Smith	robin.smith@uvi.edu	N	Assoc Professor	University of the Virgin Islands	Caribbean, ITS2, assisted evolution, facilitated sexual reproduction, holobiont engineering
Michael	Stat	michael.stat@newcastle.edu.au	Y	Senior Lecturer	University of Newcastle	symbiosis, metabarcoding, environmental DNA
Marie	Strader	stradermarie@gmail.com	Y	Assistant Professor	Texas A&M University	adaptation, acclimation, legacy effects, reproduction, Cassiopea
David	Suggett	David.Suggett@uts.edu.au	Y	Professor	University of Technology Sydney	Australia, metabolic physiology, metabolomics, volatilomics, bio-optics, chlorophyll fluorescence, phenotyping, chemo-stat culturing
Sharla	Sugierski	sugierski@gmail.com	N	Research Associate	Florida Fish and Wildlife Research Institute	Caribbean, coral restoration, reef ecology, coal health, stress response, microplastics, climate change, Acropora cervicornis, physiology
Clarisse	Sullivan	cssulliv@hawaii.edu	N	Recent Grad	Hawaii Institute of Marine Biology	Symbiodiniaceae, Montipora, Hawaii, -omics
Hannah	Swain	hls8206@mavs.uta.edu	N	PhD Student	University of Texas at Arlington	Stony corals, Caribbean, SCTLD, coral disease, transcriptomics, Symbiodiniaceae, immunity, resilience
Timothy	Swain	tswain@nova.edu	Y	Assistant Professor	Nova Southeastern University	Symbiosis, systems biology, phylogenetic comparative methods, meta-analyses
Anna	Tansik	anna.tansik@gmail.com	N	Visiting Assistant Professor	Cornell College	Caribbean, carbon ecohysiology, symbiosis
Parviz	Tavakoli-Kolour	p.tavakoli@hotmail.com	N	PhD student	University of the Ryukyus	Pacific ocean, Persian Gulf, mesophotic/shallow coral, sequencing, photophysiology, acclimation, thermal tolerance, symbiosis
Thinesh	Thangadurai	thina.sathesh@gmail.com	N	Researh Scientist	Indian Institute of Scince, Dr. Kartik Shanker lab	India, Andaman reef, Gulf of Mannar reef, ITS2,Microbiome, Distribution and Diversity
Courtney	Tierney	courtney.tierney@dpnr.vi.gov	N	Early career/natural resource manager	USVI Dept. of Planning and Natural Resources	USVI, coral disease, coral restoration, resource mangement, SCTLD, Caribbean,
Arjen	Tilstra	arjentilstra@gmail.com	N	Postdoc	University of Bremen	Holobiont microbial symbioses, nitrogen cycling, ecophysiology, Red Sea, aquaculture
Giniel Mae	Tiongson	gftiongson@msi.upd.edu.ph	N	MSc Student	University of the Philippines Diliman - The Marine Science Institute	Symbiodiniaceae, Metallomics, Nutrients, Biogeochemistry, Biotechnology
Giada	Tortorelli	Giadatortorelli@gmail.com	N	Postdoc	Hawaii institute of marine biology	Symbiosis, recognition, thermal stress, resilience, symbionts competition
Cawa	Tran	cawatran@sandiego.edu	Y	Asst Prof	University of San Diego	Aiptasia, host-microbe interactions, symbiosis, microbiome, microfluidics, larvae
Kira	Turnham	Keturnham@gmail.com	N	Phd student	Penn state	Evolution, physiology, ecology, info pacific, cultures
Victor E.	Urrutia-Figueroa	veuf1v19@gmail.com	N	Post-doc		Symbiodiniaceae, holobiont, symbiosis, photo-physiology, proteomics, phenomics, big-data
Stav	Vaknin	stavvaknin@mail.tau.ac.il	n	MSc	Tel Aviv University	octocorals, Pulsation, Xeniidae, algal acquisition
Emily	Van Buren	emily.buckley@uta.edu	N	PhD Candidate	University of Texas at Arlington	transcriptomics, omics, immunity, carribbean, machine learning
Tooba	Varasteh	toobavaraste@gmail.com	N	Postdoctoral Researcher	Federal University of Rio de Janeiro, Brazil	Brazil,
Dana	Velasco-Montoya	danna.velasco@correounivalle.edu.co	N	Masters student	Universidad del Valle, Colombia	Colombia, Symbiodiniaceae, Pocillopora, ecology, ITS2
Diana	Vergara	vergarad@umich.edu	N	PhD student	University of Michigan	Octocorals, microbiome, mollusks, phylogeography, transcriptomics, genomics, symbiosis
Joshua James	Versola	jnversola@msi.upd.edu.ph	N	MSc Student	University of the Philippines Diliman - The Marine Science Institute	Symbiodiniaceae, Metallomics, Nutrients, Biogeochemistry, Biotechnology
Silvia	Vimercati	Silvia.vimercati@kaust.edu.sa		Phd student	King Abdullah University of Science and Technology	Red Sea, hard coral Agariciidae, diverisity, phylogeny, mesophotic
Myles	Wagner	Myles_wagner@uri.edu	N	Recent Grad	University of Rhode Island	Caribbean, Brevolium, pop genomics, transcriptomics
Brian	Walker	walkerb@nova.edu	N	Research Scientist 2	Nova Southeastern University	mapping, associations to SCTLD
Mark	Warner	mwarner@udel.edu	Y	Professor	University of Delaware	in vitro and in vivo Symbiodiniaceae ecophysiology (Indo Pacific, Eastern Pacific, Caribbean), bleaching (acute and chronic heating & light interactions), photosynthesis (via active Chl a fluorescence kinetics and other methods), carbon and nitrogen balance and transfer, calcification, targeted gene expression and algal population genetics
Joyah	Watkins	jw144@rice.edu	N	PhD Student	Rice University	Symbiosis, SCTLD
Alexandra	Wen	adw44@miami.edu	N	PhD Student	University of Miami	Shuffling, comparative advantage between genera
Sara	Williams	swilliams@mote.org	N	Postdoc	Mote Marine Laboratory	Caribbean, Network Science, ecophysiology, SCTLD
Tingting	Xiang	txiang@ucr.edu	Y	Asst Prof	University of California, Riverside	Functional genomics, Symbiodinaceae symbiosis
Hiroshi	Yamashita	hyamashita@fra.affrc.go.jp	Y	Senior Researcher	Fisheries Technology Institute, Japan Fisheries Research and Education Agency	Symbiodiniaceae, cultures, free-living, symbiosis, microscopic observations, Acropora, Tridacna, Japan
Emily	Yeager	eay8@miami.edu	N	PhD student	University of Miami	Expulsion, symbiosis, uptake, distribution, Caribbean, cultures
JS	Yogesh kumar	Yogeshkumarzsi16@gmail.com	N	Scientist	Zoological Survey of India, Sundarban Regional Centre	Coral and Octocorals
Maren	Ziegler	maren.ziegler@bio.uni-giessen.de	Y	Junior research group leader (Asst Prof)	Justus Liebig University Giessen, Germany	Indopacific, Red Sea, Galaxea and other stony corals, symbiosis, coral bleaching, aquarium experiments, symbiont engineering, molecular ecology, ecophysiology
Carla	Zilberberg	carla.zilberberg@macae.ufrj.br	N	Associate Professor	Federal University of Rio de Janeiro, Brazil	Symbiodiniacea diversity, biogeography, ecology and taxonomy, coral bleaching, resilience, Brazilian corals, ITS2, metabarcoding , Coral connectivity
Kevin	Bairos-Novak	kevin.bairosnovak@my.jcu.edu.au	N	PhD Student	James Cook University	Modelling, population ecology, evolution, climate change
Phongsathorn	Röser	binthayot@gmail.com	N	MSc	University of Rostock	Symbiodiniaceae, physiology, growth, respiration, pre- and post thermal acclimation, Irradiance, Oxygen Evolution , in vitro
Claudia Tatiana	Galindo-Martínez	cgalindomartinez@ucsd.edu	N	Postdoc	Scripps Institution of Oceanography UC San Diego	Symbiosis, ecophysiology
Kayla	Cayemitte	Kayla.cayemitte2157@gmail.com	N	Graduate of 2023	Ursinus College, Woods Hole Oceanographic Institute	Symbiosis, Astrangia poculata, thermal and salinity stress, PAM, Fluorescence, Ramicrusta ecology
Rounak	Thakur	rounak.thakur96@gmail.com	N	MSc	National Institute of Oceanography, Goa, India	-
Jerome	Uy	jquy@eckerd.edu	N	Undergraduate student (graduating spring 2023)	Eckerd College	Symbiosis, coral, Aiptasia, population genetics, Indo-Pacific, microbiome, ecology
Max	Moonier	mmad2019@pomona.edu	N	Undergraduate student	Pomona College	Transcriptomics, genomics, central pacific, resiliance, restoration, stony corals
Arthur	Lima	arthurwlima@gmail.com	N	Research Technician	Universidade Federal do Rio De Janeiro, Brasil	Symbiodiniaceae diversity, ecophysiology, Symbio-bacteria interactions
Caitlin	Younis	caitlin.younis@student.uts.edu.au	N	PhD Student	University of Technology Sydney	Symbiodiniaceae diversity and adaptations, trace metal bioaccumulation and biodistribution, photophysiology, genomics, GBR, thermal tolerance
Pim	Bongaerts	pbongaerts@calacademy.org	N	Group leader	California Academy of Sciences	Molecular ecology, Scleractinian corals, mesophotic coral ecosystems
Liam	Lachs	liamlachs@gmail.com
Maria	Andersen	mara.andersen@my.jcu.edu.au	N	Research Associate	University of Guam	Symbiosis, coral, Acropora, population genetics, Indo-Pacific, microbiome, ecology, restoration
Andrea	Kirk	akirk11@uncc.edu		PhD candidate	University of north carolina at Charlotte	Symbiodiniaceae symbiosis, aiptasia, coral, cell biology
Olivier	Collard	Olivier1996collard@hotmail.fr		Grad student	University of liège	Panama, pocillopora. spp, coral, genetic, thermic/salinity stress
Luella	Allen0Waller	allwall@sas.upenn.edu	N	PhD candidate	University of Pennsylvania	Symbiosis, climate change, cell physiology, resilience, ecology, coral, Aiptasia
Katherine	Suchanec	ksuchanec3@gmail.com	N	Early career	FDEP/UF	Gulf of Mexico, ecology and taxonomy, hardbottom habitat, rresilienec, natural resource management, climate change
Affendi	Yang Amri	affendi@um.edu.my	N	Research Officer	IOES, Universiti Malaya, Malaysia	South China Sea, Straits of Malacca, Scleractinian corals, ecophysiology, diversity, restoration (#ProjectPULIH)
Kelsey	Beavers	kbeavers97@gmail.com	N	PhD candidate	University of Texas at Arlington	SCTLD, Cnidarian immunity and disease, Caribbean corals, Symbiodiniaceae, Transcriptomics
Margo	Boucetta	margoboucetta@gmail.com	N	prospective MS student
Christian	Voolstra	christian.voolstra@uni-konstanz.de	Y	Professor	University of Konstanz, Germany	Ben Hume and I conceived and run SymPortal.org, next-gen sequencing, Arabian Seas, fine-scale delinieation of Symbiodiniaceae
Stephane	Roberty	sroberty@uliege.be	N	Assistant Professor	University of Liège, Belgium	Photophysiology
Elizabeth (Liz)	Hambleton	elizabeth.hambleton@univie.ac.at	N	Group Leader	University of Vienna	coral, Aiptasia, Waminoa acoel flatworm, evolution, single-cell sequencing, lipidomics, Pacific, Mediterranean, temperate Symbiodinium
Rodrigo	Moura	moura.uesc@gmail.com	N	Associate Professor	Universidade Federal do Rio de Janeiro, Brazil	Southwestern Atlantic, coral bleaching,
Katie	Barott	kbarott@sas.upenn.edu	N	Assistant Professor	University of Pennsylvania	Cell biology and ecophysiolgy of cnidarian symbioses, global change biology & ecology
Alexus	Philley	Axp1997@miami.edu	N	MPS Graduate	Rosenstiel School of Marine, Atmospheric, & Earth Sciences	Tropical Marine ecology, coral, coral disease, SCTLD, symbiosis
Livia	Villela	liviabvillela@gmail.com	N	PhD student	Universidade Federal do Rio de Janeiro, Brazil	Symbiodiniacea diversity, coral bleaching, Southwestern Atlantic
Ana Paula	Moreira	anapaula.biomar.ufrj@gmail.com	N	Posdoc researcher	Universidade Federal do Rio de Janeiro, Brasil	Microbioma, Symbiodiniacea-bacteria -coral interactions, networks, Southwestern Atlantic
Sandra	Chupinsky	sandrachupinsky@gmail.com	N	Early career	FDEP	Water quality, Gulf of Mexico, hardbottom, conservation and management
Ben	Farmer	bfarme8@lsu.edu	N	PhD Student	Louisiana State University	SCTLD, Caribbean, predictive modeling of coral disease transmission
Mariyam Shidha	Afzal	mshidha@gmail.com	N	PhD Student	University of the Ryukyus	Coral bleaching, Pacific ocean, Indian Ocean, Thermal stress, Diversity, Coral reproduction, ecology and taxonomy, early life stage, coral-algae competition, climate change
Carly	Karrick	cek6@rice.edu	N	PhD Student	Rice University	Pacific, Caribbean, SCTLD, symbiosis, resilience, microbiome, metabarcoding, differential gene expression, Symbiodiniaceae meiosis
Rebecca	Gibbel	RebeccaCampbellGibbel@gmail.com	N	Master's Student	University of the Virgin Islands	Pacific, Caribbean, SCTLD, Symbiodiniaceae
Jeana	Drake	jeanadrake@g.ucla.edu	N	Assistant Project Scientist	UCLA	Pacific, Red Sea, biomineralization
Narissa	Bax	narissa.bax@gmail.com	N	Early career	Centre for Marine Socioecology, Institute for Marine and Antarctic Studies, University of Tasmania	Stylasteridae
Viridiana	Avila-Magaña	viridianaavilamagana@gmail.com	N	Posdoc researcher	University of Colorado Boulder	Symbiodiniaceae evolution, host-Symbiodiniaceae gene expression evolution (corals, upside-down jellyfisn, Fraginae photosymbiotic cockles), Coral-Symbiodiniaceae-microbiome stability.
Tali	Mass	tmass@univ.haifa.ac.il	N	Associate Professor	University of Haifa
Federica	Scucchia	federica.scucchia@studio.unibo.it	N	PhD Student	University of Haifa
Kalyan	De	kalyandeaqua@gmail.com	N	Postdoc	National Institute of Oceanography, India	Indian coral reefs, Coral bleaching, Symbiodiniaceae, Multiple stressors
Noah	Taylor	noahdt@gmail.com	N	Research scientist	Ginkgo Bioworks	Evolution, heat stress, acid stress
Shani	Levy	Levyshani78@gmail.com	N	Postdoc	Centre for Genomic regulation (CRG), Barcelona.	Cnidarian, coral bleaching, single-cell RNA seq, heat stress
Kevin	Wong	kevinhwong1@gmail.com	N	Postdoc Researcher	University of Miami Rosenstiel School of Marine, Atmospheric, and Earth Science	Coral, bleaching, epigenetics, single cell omics, omic integration
Lauren	Fuess	lfuess@txstate.edu	Y	Assistant Professor	Texas State University	symbiosis, immunity, integrative omics, disease, astrangia, exaiptasia, microbiome
Nicholas	Durgadeen	ndurgadeen14@gmail.com	N	Lab tech	University of the Virgin Islands	Caribbean, SCTLD, Symbiodiniaceae diversity, coral disease
Olivia	Hackney	livhackney@hotmail.com	N	Undergraduate student	University of Exeter
Andrea	Landaverde	andrealandaverde93@gmail.com	N	Research Scientist Assistant	University of Texas at Austin
Monalisa	Ribeiro Bettim	monalisa.bettim@usp.br	N	PhD Student	University of São Paulo	bioinorganic chemistry, lsupplement, manganese, resilience, bleaching
Brendan	Cornwell	bcornwel@stanford.edu	N	Postdoc	Hopkins Marine Station of Stanford University	U.S. Pacific coast and tropical Pacific, population genomics, local adaptation, host-symbiont interactions
Cheryl	Ames	ames.cheryl.lynn.a1@tohoku.co.jp	N	Associate Professor	Tohoku University	Japan, Caribean, Cassisomes, Rhizostome jellyfish
Praveena	Karunanithi	praveenakarunanithi@gmail.com	N	Senior Research Fellow	School of Biological Sciences Madurai Kamaraj University	Coral Diseases-SCTLD, resilience, microbiome (transcriptome), differential gene expression, Symbiodiniaceae, GUlf of Mannar and Palk bay Corals India
Sharmila	K Murugan	sharmim743@gmail.com	N	Junior Research Fellow	School of Biological Sciences Madurai Kamaraj University	Coral Diseases-SCTLD, resilience, microbiome (transcriptome), differential gene expression, Symbiodiniaceae, GUlf of Mannar and Palk bay Corals India
Moriah	Sevier	moriah.sevier@uvi.edu	N	Field Tech	University of the Virgin Islands	Caribbean, Coral Diseases-SCTLD, resilience, microbiome, differential gene expression, Symbiodiniaceae, reef ecology, histology, etiology,
Kathryn	Cobleigh	kathryncobleigh@gmail.com	N	Research Coordinator	University of the Virgin Islands	Caribbean, coral restoration, resilience, microbiome
Paola	Rodríguez Troncoso	alma.rtroncoso@academicos.udg.mx	N	Professor	Universidad de Guadalajara	coral bleaching, resistance, restoration, Eastern Tropical Pacific
David	Abrego	david.abrego@scu.edu.au	N	Senior Lecturer	Southern Cross University, Coffs Harbour NSW, Australia	Indo-Pacific, heat stress adaptation, host-symbiont interactions and trade offs
Anny	Cárdenas	acardenas@american.edu	N	Assistant professor	American University	U.S. Pacific coast and tropical Pacific, population genomics, local adaptation, host-symbiont interactions
Kristen	Ewen	kristen_ewen@nps.gov	N	Park Manager	National Park Service	Caribbean, SCTLD, Symbiodiniaceae diversity, Restoration, coral disease
Carlos	Alvarez Roa	c.alvarezroa@aims.gov.au	N	Lab manager	Australian Institute of Marine Sciences	Heat stress adaptation, culturing
Emma	Marangon	emma.marangon@my.jcu.edu.au	N	PhD Student	James Cook University	GBR, corals, sponges, transcriptomics, heat stress
Laura	Dennis	laura.eli.dennis@gmail.com	N	Recent Msc grad	Ghent University (IMBRSea) | CIBNOR
Mohammad Reza	Shokri	M_Shokri@sbu.ac.ir	N	Associate Professor	Department of Animal Sciences and Marine Biology, Faculty of Life Sciences and Biotechnology, Shahid Beheshti University, Tehran, Iran	The Persian Gulf, Corals, Coral Associated Bacteria, Coral restoration
James	Fang	james.fang@polyu.edu.hk	N	Assistant Professor	The Hong Kong Polytechnic University	Corals, sponges, bivalves, microplastics, artificial reefs, aquaculture
Kelly	Gómez-Campo	kjg27@psu.edu	N	Assistant Research Professor	The Pennsylvania State University	Photobiology, physiological ecology, functional genomics
Shanna	Hanes	shanes5@utsouthern.edu	N	Associate Professor	University of Tennessee Southern	Coral bleaching, cell death mechanisms, heat stress responses, ultrastructure, microscopy, gene expression
Mohammad	Moniruzzaman	m.monir@miami.edu	N	Assitant Professor	University of Miami Rosenstiel School of Marine, Atmospheric, and Earth Science	Molecular underpinnings and ecological implications of virus-symbiont interactions, Coral diseases, Resilience
Shumpei	Maruyama	smaruyama@carnegiescience.edu	N	Postdoc	Carnegie Insitution for Science Department of Embryology	symbiosis, heat stress, glycomics, nutritional dynamics, host-symbiont interactions, Aiptasia, CRISPR knockouts
Rachael	Best	rbest@bio.fsu.edu	N	PhD Student	Florida State University	Gulf of Mexico, Caribbean, Octocorals, Plasticity
Wilson	Bry	bryan.wilson@biology.ox.ac.uk	N	Research Fellow	University of Oxford	Indian Ocean, South Pacific, Caribbean, Ctenella, PAC, Chagos Archipelago
Imam	Bachtiar	imambachtiar@unram.ac.id	N	Associate Professor	University of Mataram	Indian Ocean, West Pacific, Coral Triangle, coral reproductiom, coral reef resilience
					Cheryl	Ames	ames.cheryl.lynn.a1@tohoku.co.jp	N	Associate Professor
